# Supplementary material for: Dry approach production of a garnet solid electrolyte membrane for lithium batteries
Source: Royal Society of Chemistry journal article supplement (doi:10.1039/d3qi01319g), 2023-01-01
Supplement: d3qi01319g1.pdf [file d3qi01319g1.pdf]

## Supplementary Materials

# Dry Approach Production of Garnet Solid Electrolyte Membrane for Lithium Batteries

Qiulin Li<sup>a</sup>, Yiqiu Li<sup>b</sup>, Hao Chen<sup>a</sup>, Hui Liu<sup>a</sup>, Lianjie Li<sup>a</sup>, Jie Song<sup>\*c</sup>, Maowen Xu<sup>a\*</sup>, Shu-  
Juan Bao<sup>a\*</sup>

<sup>a</sup>Key Laboratory of Luminescent and Real-Time Analytical Chemistry, Ministry of Education, Institute for Clean Energy and Advanced Materials, Faculty of Materials and Energy, Southwest University, Chongqing 400715, P. R. China

<sup>b</sup>Tai'an Faraday Energy Technology Co., Ltd, Taian, Shandong 271000, P. R. China

<sup>c</sup>Shandong Zero One Four Advanced Materials Co., Ltd Taian, Shandong 271000, P. R. China

\*Corresponding authors.

*E-mail* addresses: [baoshj@swu.edu.cn](mailto:baoshj@swu.edu.cn) (S. J. B); [xumaowen@swu.edu.cn](mailto:xumaowen@swu.edu.cn); [songjie@014am.com](mailto:songjie@014am.com).

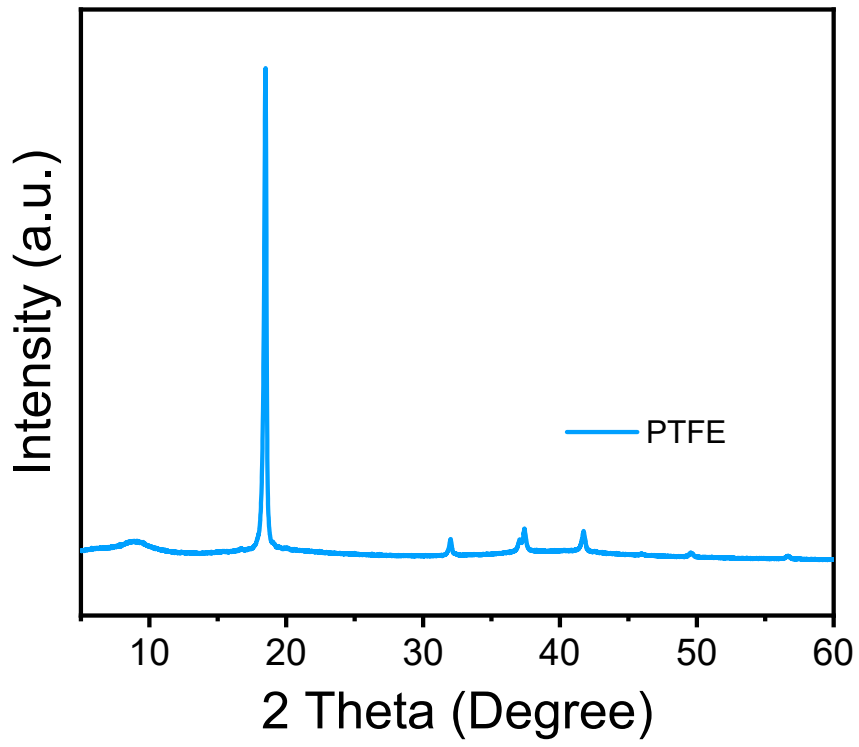

Fig. S1 The XRD of PTFE powder

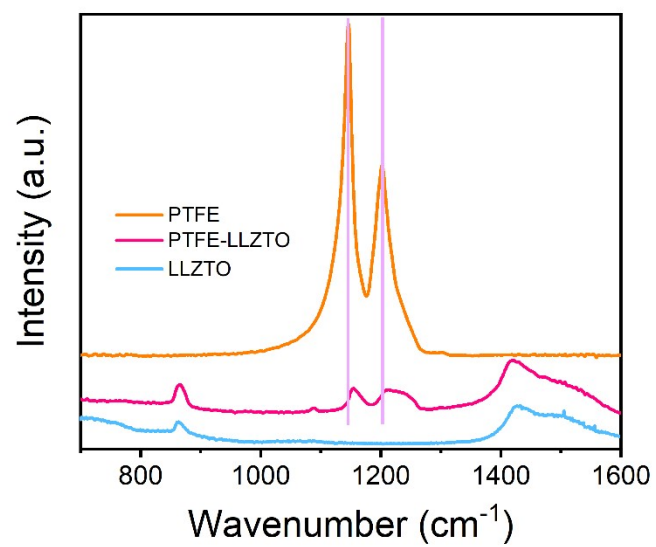

Fig. S2 Infrared spectroscopy of PTFE, LLZTO and PTFE-LLZTO membrane.

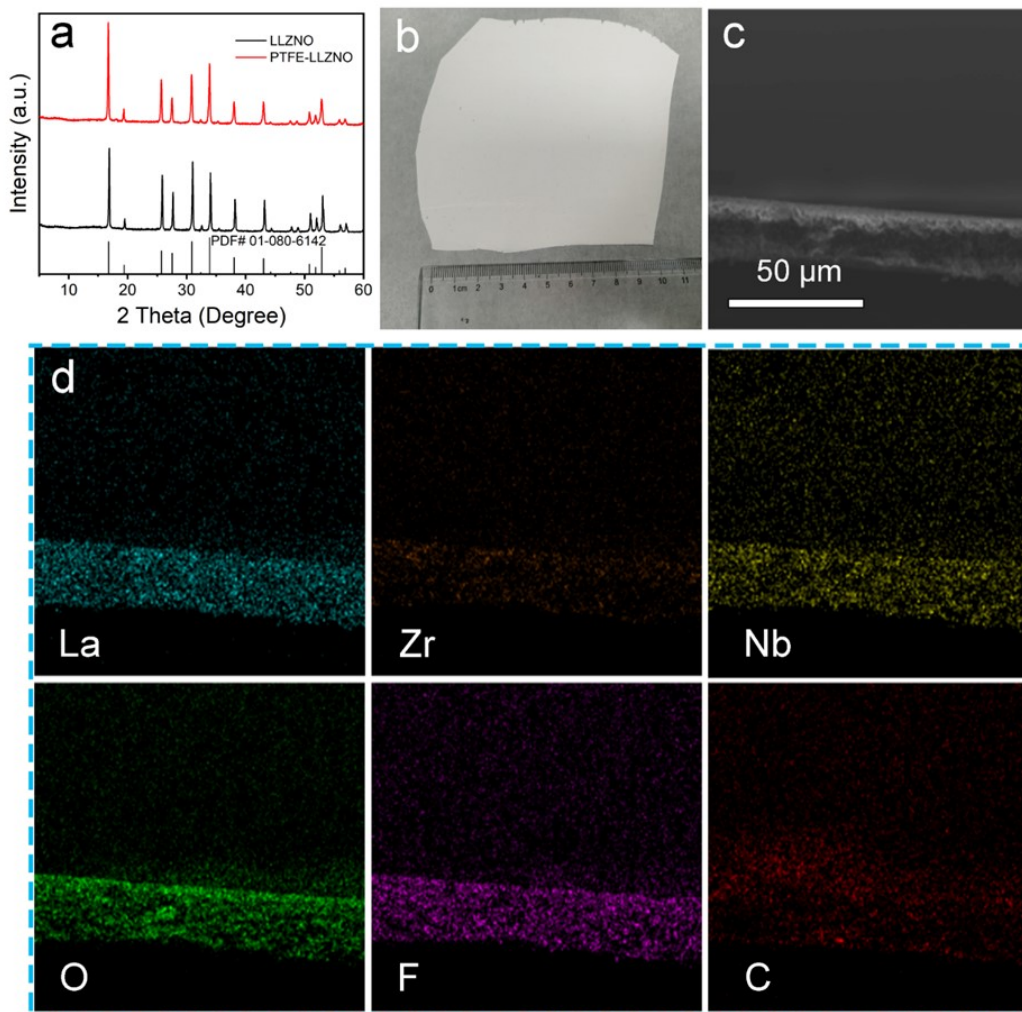

Fig. S3 a) The XRD of LLZNO and PTFE-LLZNO electrolyte membrane; b) The picture of LLZNO; c) The SEM of the cross-sectional of PTFE-LLZNO electrolyte membrane; d)The EDS mapping of Fig. c.

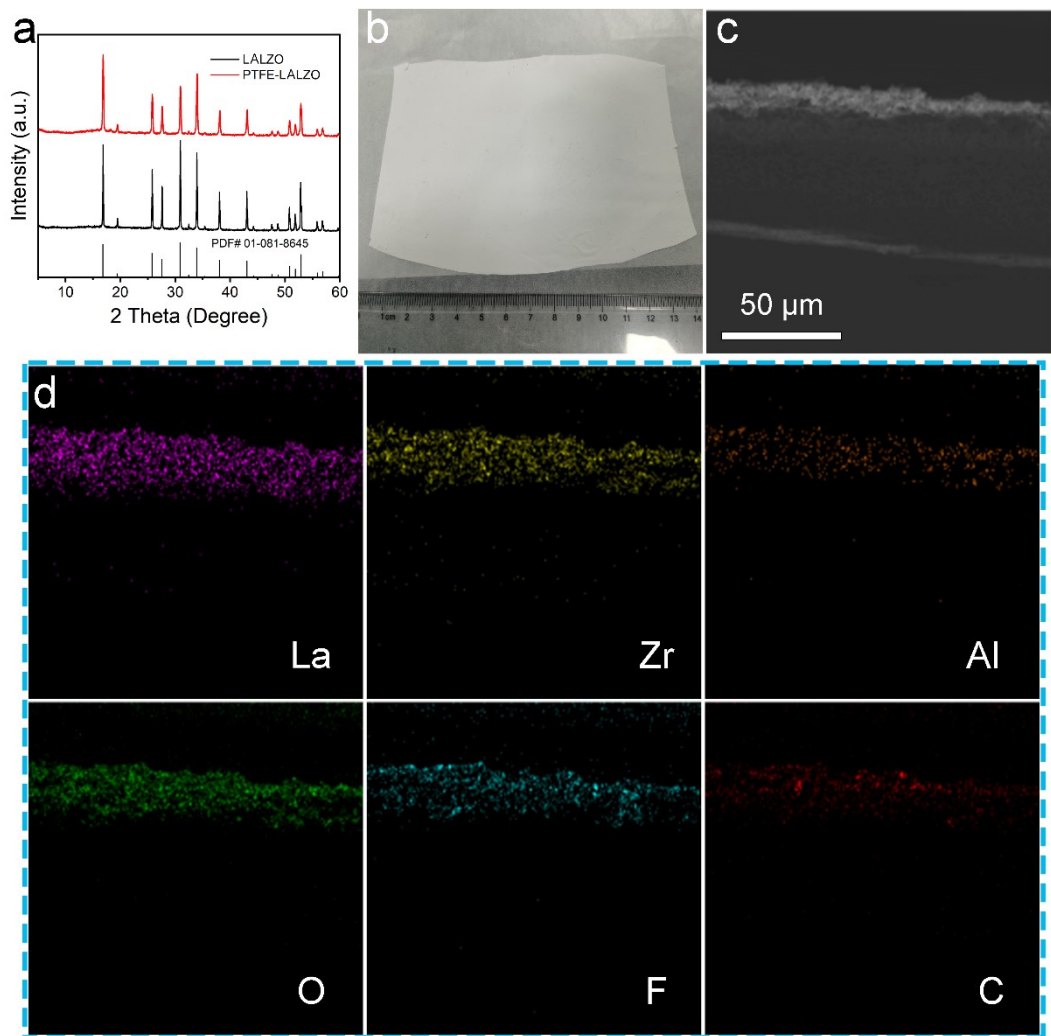

Fig. S4 a) The XRD of LALZO and PTFE-LALZO electrolyte membrane; b) The picture of LALZO; c) The SEM of the cross-sectional of PTFE- LALZO electrolyte membrane; d)The EDS mapping of Fig. c.

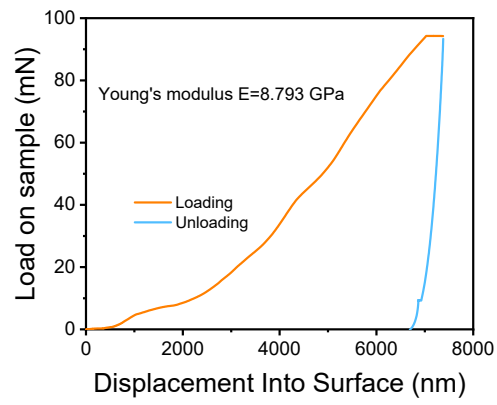

Fig. S5 Load Displacement Curve of PTFE-LLZTO Membrane

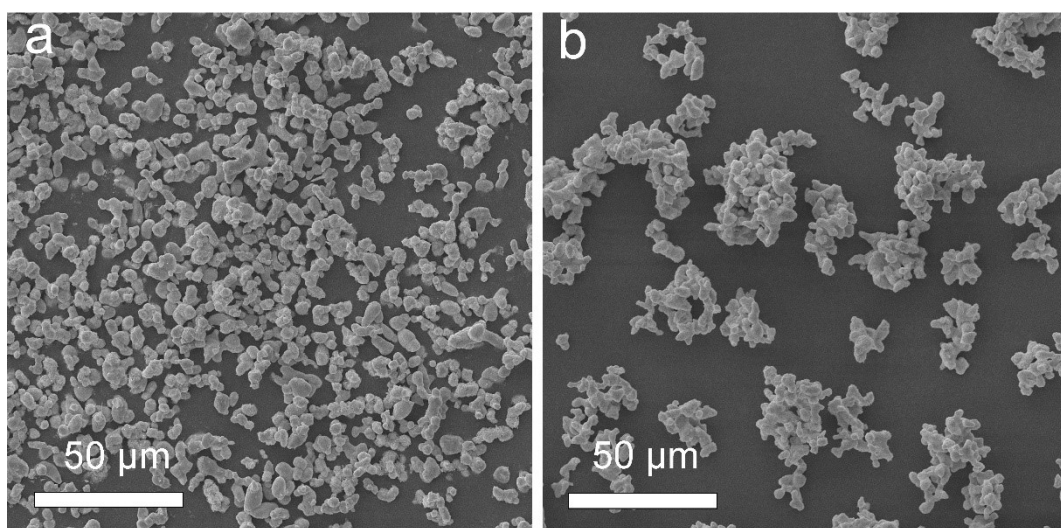

Fig. S6 The SEM of PTFE@LLZTO powder

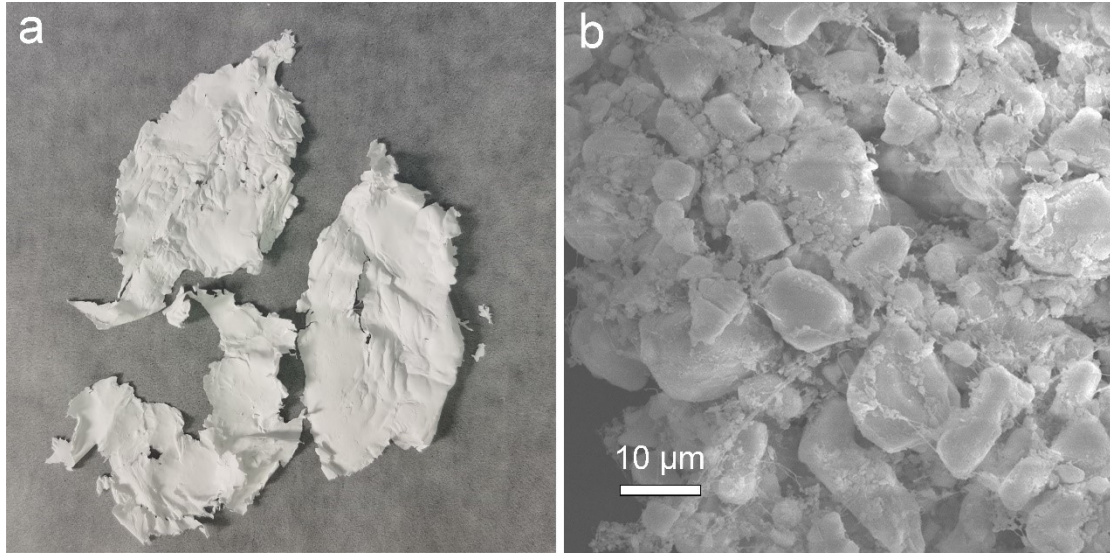

Fig. S7 a) The picture of PTFE-LLZTO electrolyte membrane by ball mill to obtain the PTFE-LLZTO matrix; b) the SEM of PTFE-LLZTO matrix by a ball mill



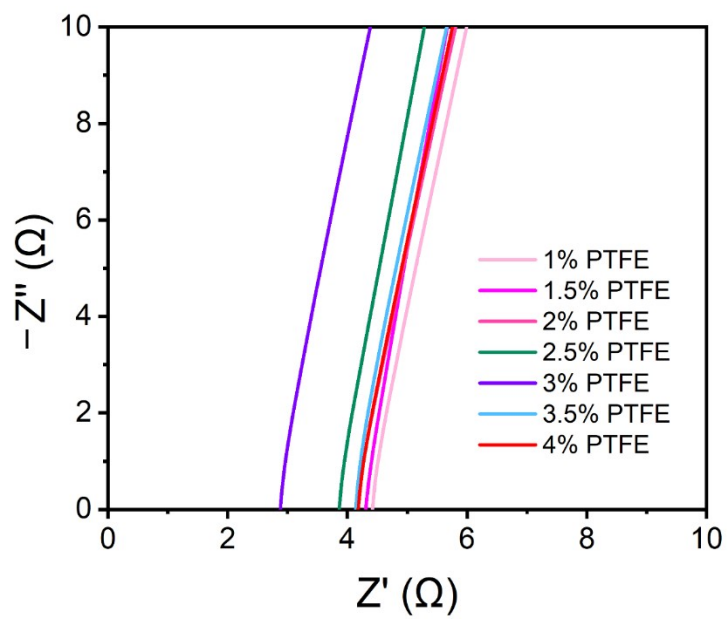

Fig. S8 The EIS of PTFE-LLZTO electrolyte membrane with different content PTFE.

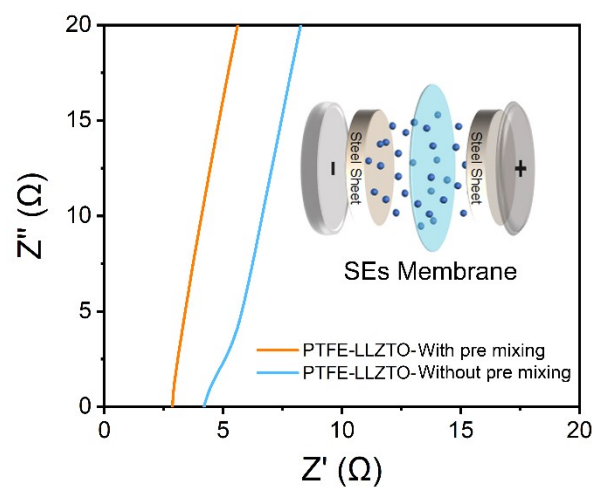

Fig. S9 The EIS of PTFE-LLZTO membrane with (a) and without (b) pre mixing at different locations on the same membrane.

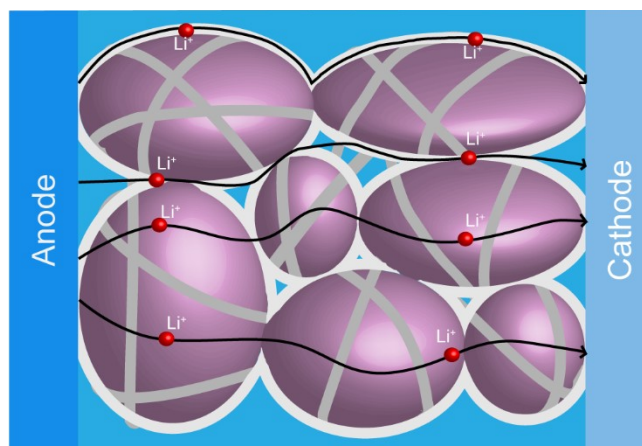

Fig. S10 Schematic diagram of  $\text{Li}^+$  transport channel for PTFE-LLZTO membrane at discharge.  $\text{Li}^+$  is expected to have three transmission channels, LLZTO, Interface, LLZTO-Interface-LLZTO (“Interface” is the interface of liquid electrolytes (LEs) and LLZTO).

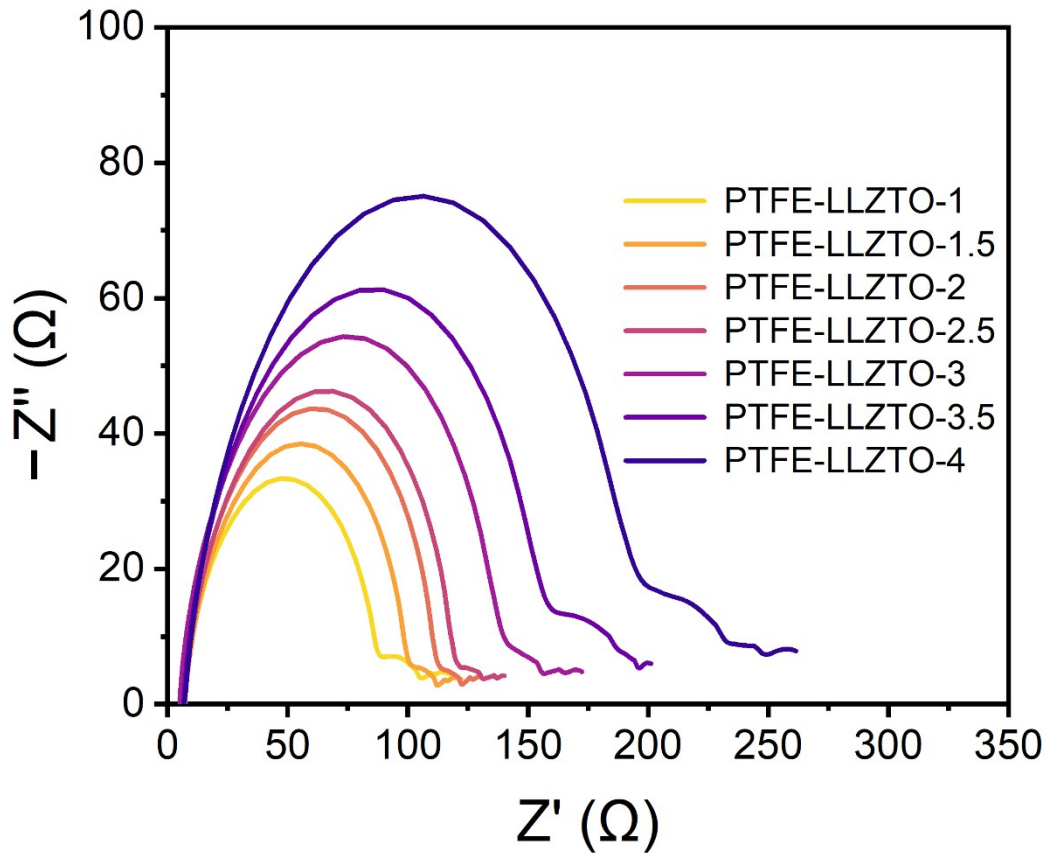

Fig. 11 The interfacial EIS of Li/PTFE-LLZTO with different content PTFE

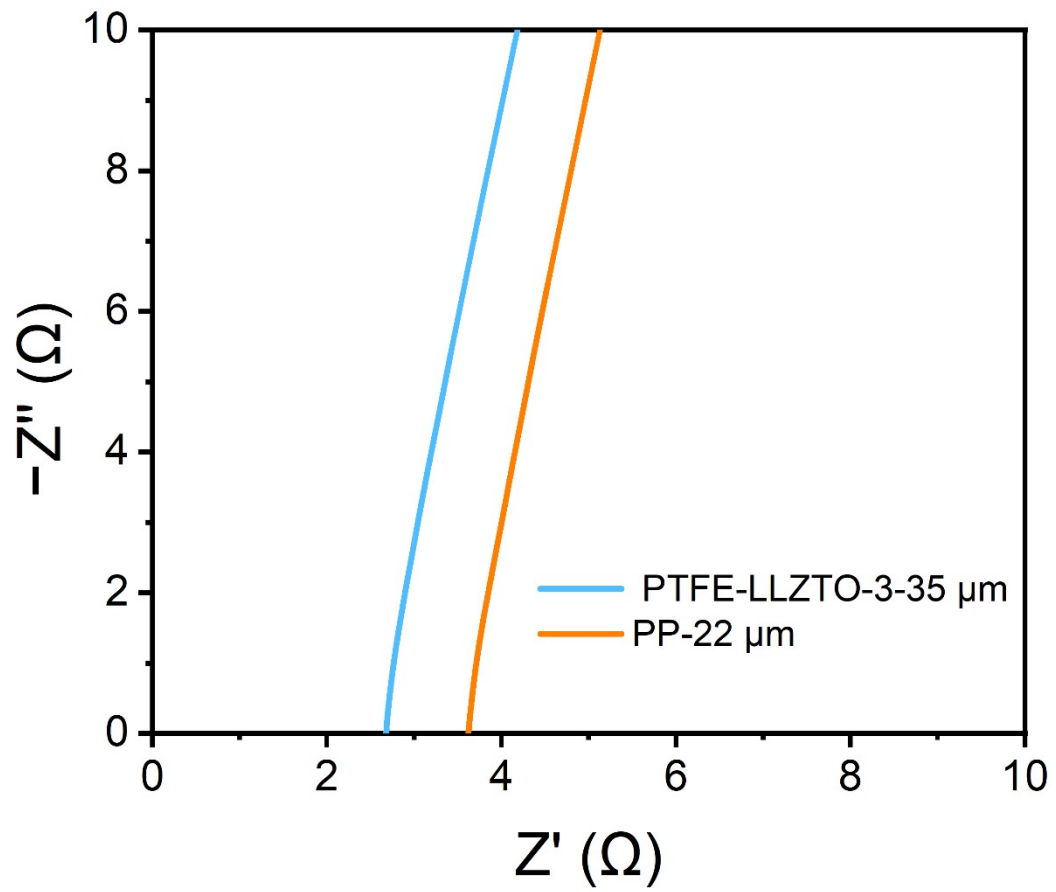

Fig. S12 The EIS of PTFE-LLZTO-3-35 μm and PP

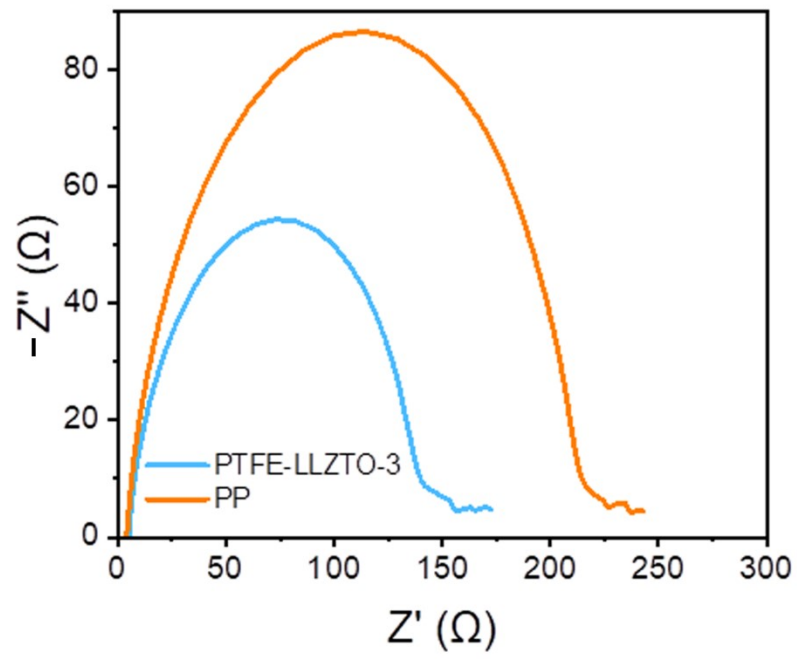

Fig. S12 The interfacial EIS of PTFE-LLZTO-3 and PP with Li

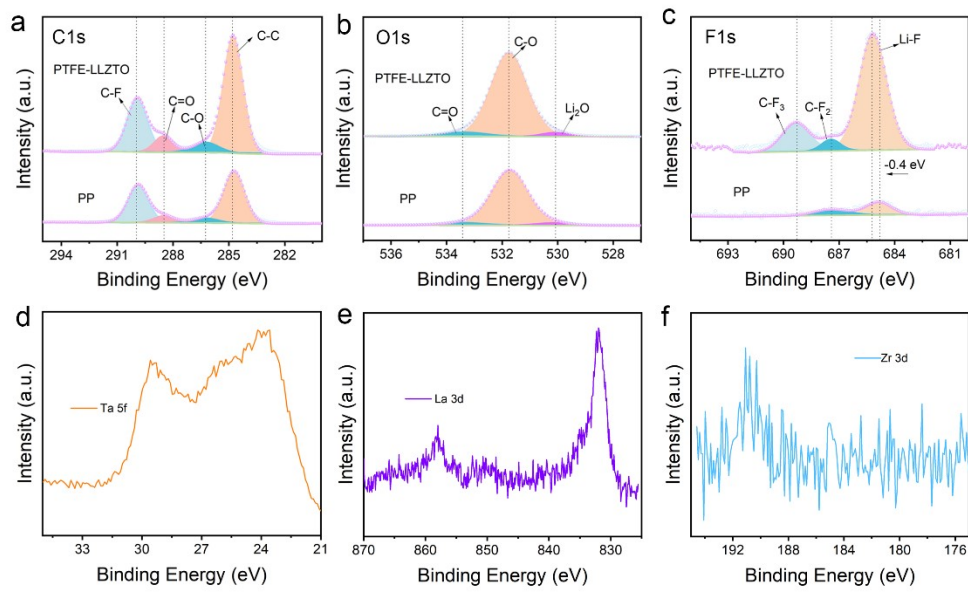

Fig. 13 XPS spectroscopy of a) C1s, b) O1s and c) F1s on Li anode of Li/PTFE-LLZTO/Li and Li/PP/Li after 20 hours of cycling, XPS spectroscopy of a) Ta5f, b) La3d and c) Zr3d on Li anode of Li/PTFE-LLZTO/Li after 20 hours cycling.

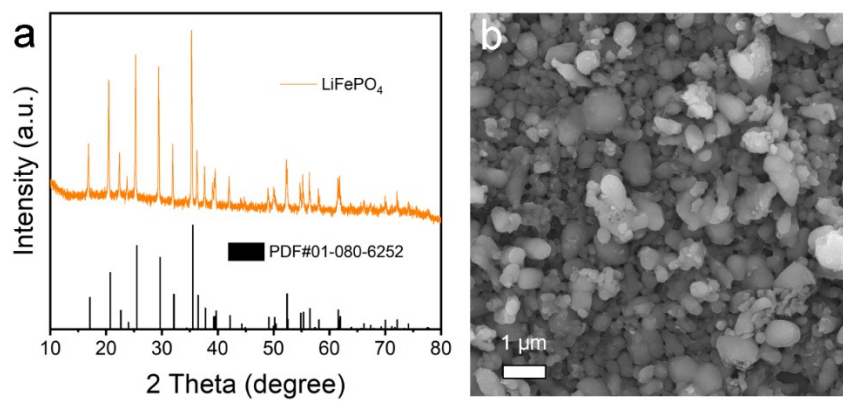

Fig. S14 a) The XRD pattern of LiFePO<sub>4</sub>; b) The SEM image of LiFePO<sub>4</sub>
